# Supplementary material for: Amphiphilic graphene oxide stabilisation of hexagonal BN and MoS2 sheets
Source: Royal Society of Chemistry journal article supplement (doi:10.1039/c5cc02066b), 2015-01-01
Supplement: c5cc02066b1.pdf [file c5cc02066b1.pdf]

## Supporting Information

### Amphiphilic graphene oxide stabilisation of hexagonal BN and MoS<sub>2</sub> sheets

M. Haniff Wahid<sup>a,b</sup>, Xianjue Chen<sup>a\*</sup>, Christopher T. Gibson<sup>a</sup> and Colin L. Raston<sup>a\*</sup>

<sup>a</sup> Centre for NanoScale Science and Technology, School of Chemical and Physical Sciences, Flinders University, Bedford Park, SA 5042, Australia. E-mail: colin.raston@flinders.edu.au; Tel: +61 88201 7958

<sup>b</sup> Department of Chemistry, Faculty of Science, Universiti Putra Malaysia, 43400 Serdang, Selangor, Malaysia

#### S1 Effect of acidic and basic pH

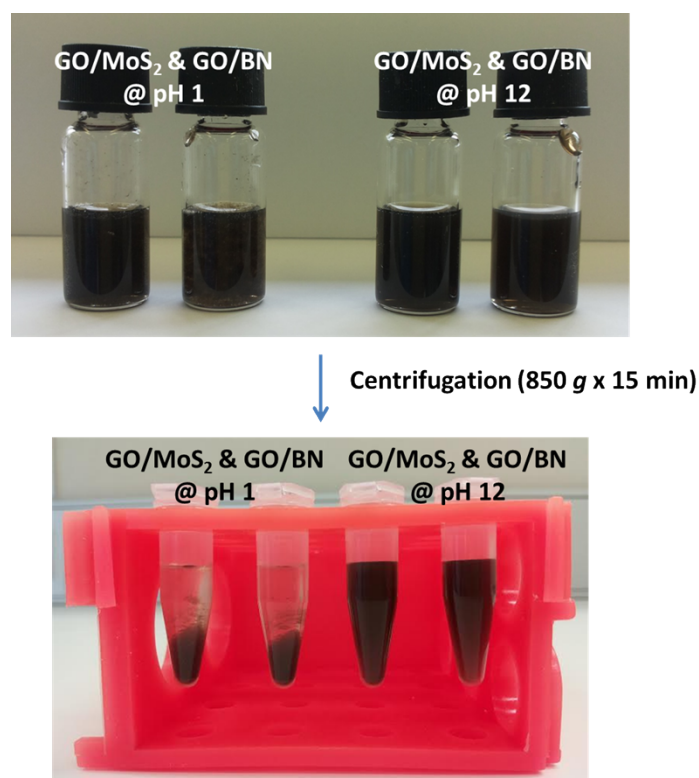

**Figure S1.** Photograph images of the resulting dispersions at pH 1 and pH 12 respectively, establishing the formation of stable dispersions at basic pH, as for the dispersions at neutral pH.

S2 TEM images of exfoliated BN and MoS<sub>2</sub> at pH 12.

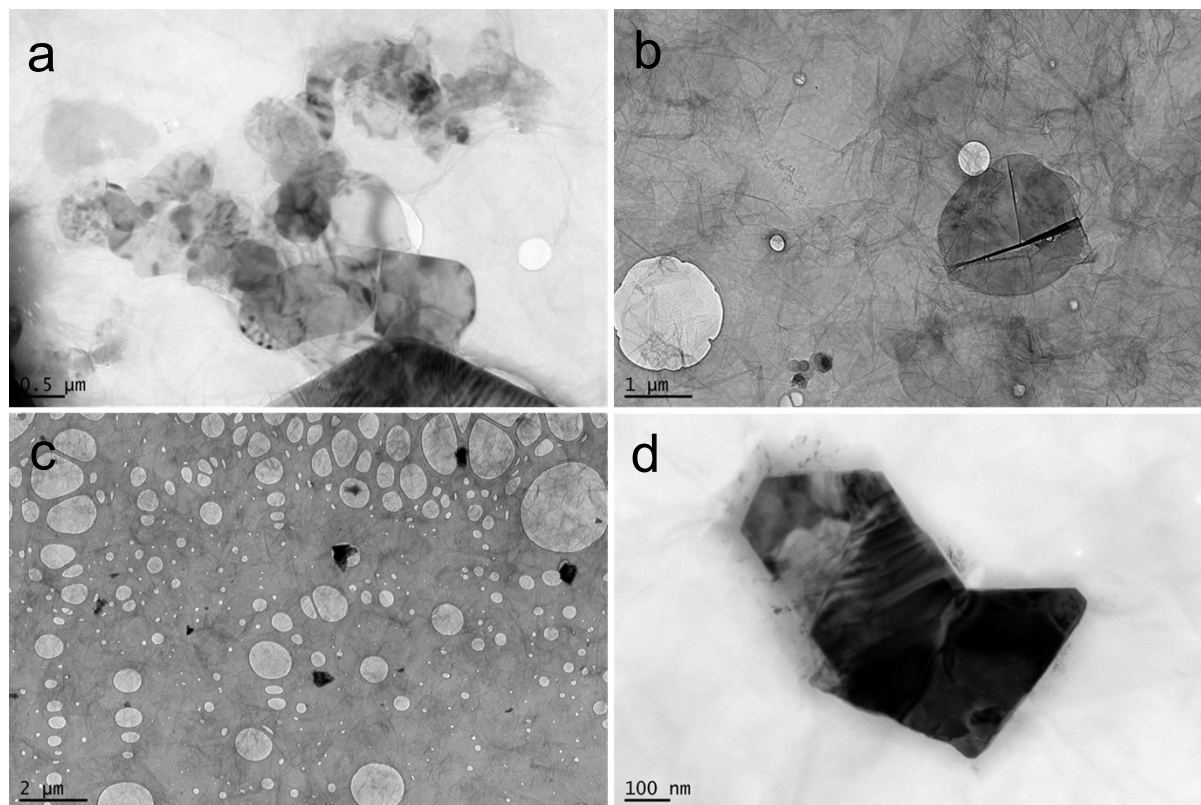

**Figure S2.** TEM images of the (a,b) GO/BN and (c,d) GO/MoS<sub>2</sub> obtained in basic conditions (pH 12).
